# Supplementary material
Source: PubMed Central journal article supplement (PMC3370274)
Supplement: mmc1.pdf [file mmc1.pdf]

Supplemental Data

Smith-Magenis Syndrome Results in Disruption of *CLOCK*

Gene Transcription and Reveals an Integral Role for

*RAI1* in the Maintenance of Circadian Rhythmicity

Stephen R. Williams, Deborah Zies, Sureni V. Mullegama, Michael S. Grotewiel, and Sarah H. Elsea

Table S1. Primers for Mutagenesis of *CLOCK* Constructs

| Primer | Sequence                                                      | Restriction Site Introduced | Constructs                                                    |
|--------|---------------------------------------------------------------|-----------------------------|---------------------------------------------------------------|
| p53    | gcactttagtgactcttcttcagaaaggtaccgctcaaatatcaacaaaa            | <i>KpnI</i>                 | <i>CLOCK</i> <sup>Del1</sup> and <i>CLOCK</i> <sup>Del6</sup> |
| p53R   | ttttgtgatattgagcggtagccttctgaaagaagagtcactaaagtc              | <i>KpnI</i>                 | <i>CLOCK</i> <sup>Del1</sup> and <i>CLOCK</i> <sup>Del6</sup> |
| p800   | ccattaatgcacagccttcccatattcagagctcccaccagagtg                 | <i>SacI</i>                 | <i>CLOCK</i> <sup>Del2</sup>                                  |
| p800R  | ccactctggtggggagctctgaatatggggaaggctgtgcattaatgg              | <i>SacI</i>                 | <i>CLOCK</i> <sup>Del2</sup>                                  |
| p798   | cacataaaaaactgagggttaaggtaccgagatttcccattgactcca              | <i>KpnI</i>                 | <i>CLOCK</i> <sup>Del4</sup>                                  |
| p798R  | tggagtcaatgggaaatctcggtagccttaccctcagtttttatctg               | <i>KpnI</i>                 | <i>CLOCK</i> <sup>Del4</sup>                                  |
| p802   | atatcaacaaaaaaagactttagaacattaatttggtaccttagcttttctaatttaatac | <i>KpnI</i>                 | <i>CLOCK</i> <sup>Del5</sup> and <i>CLOCK</i> <sup>Del3</sup> |
| p802R  | gtattaaattagaaaacgtaaaggtaccaaatatgttctaaagtctttttgttgat      | <i>KpnI</i>                 | <i>CLOCK</i> <sup>Del5</sup> and <i>CLOCK</i> <sup>Del3</sup> |

Supplemental Methods

Site directed mutagenesis (QuikChange II Kit, Stratagene, Inc.) was used according to manufacturer instructions with specific primers to create either a *SacI* or a *KpnI* restriction enzyme site within the appropriate *CLOCK*<sup>Luc</sup> construct (bp 1-721). A *KpnI* site was introduced at base pair 375 in the *CLOCK*<sup>Luc</sup> sequence, and the resulting plasmid was digested with *KpnI*. The remaining *CLOCK*<sup>Luc</sup> plasmid was ligated back together to create *CLOCK*<sup>Del1</sup> (bp 375-721), and the fragment that was removed was ligated into a new pGL3 vector to create *CLOCK*<sup>Del6</sup> (bp 1-374). A *SacI* site was introduced into *CLOCK*<sup>Del1</sup> at base pair 533. Digestion and ligation of the resulting construct created *CLOCK*<sup>Del2</sup> (bp 375-533). *CLOCK*<sup>Del4</sup> (bp 423-533) and *CLOCK*<sup>Del5</sup> (bp 483-533) were created by introducing a *KpnI* site in plasmid *CLOCK*<sup>Del2</sup> at positions 423 and 483, respectively, and performing the digestion and ligation procedure. Finally, the fragment removed from *CLOCK*<sup>Del2</sup> to create *CLOCK*<sup>Del5</sup> was ligated into a new pGL3 vector to create *CLOCK*<sup>Del3</sup> (bp 375-483).
